# Supplementary material for: Cu(ii)–Ln(iii) (Ln = Gd, Tb and Dy) complexes of an unsymmetrical N2O3 donor ligand: field induced SMM behaviour of Cu(ii)–Tb(iii) complexes
Source: Royal Society of Chemistry journal article supplement (doi:10.1039/d4dt00304g), 2024-01-01
Supplement: d4dt00304g1.pdf [file d4dt00304g1.pdf]

### Supporting Information

## Cu(II)-Ln(III) (Ln = Gd, Tb and Dy) complexes of an unsymmetrical N<sub>2</sub>O<sub>3</sub> donor ligand: Field induced SMM behaviour for Cu(II)-Tb(III) complex

Pradip Bhunia,<sup>a</sup> Souvik Maity,<sup>a</sup> Tanmoy Kumar Ghosh,<sup>a</sup> Arpan Mondal,<sup>b</sup> Júlia Mayans,<sup>c</sup> and Ashutosh Ghosh<sup>\*a</sup>

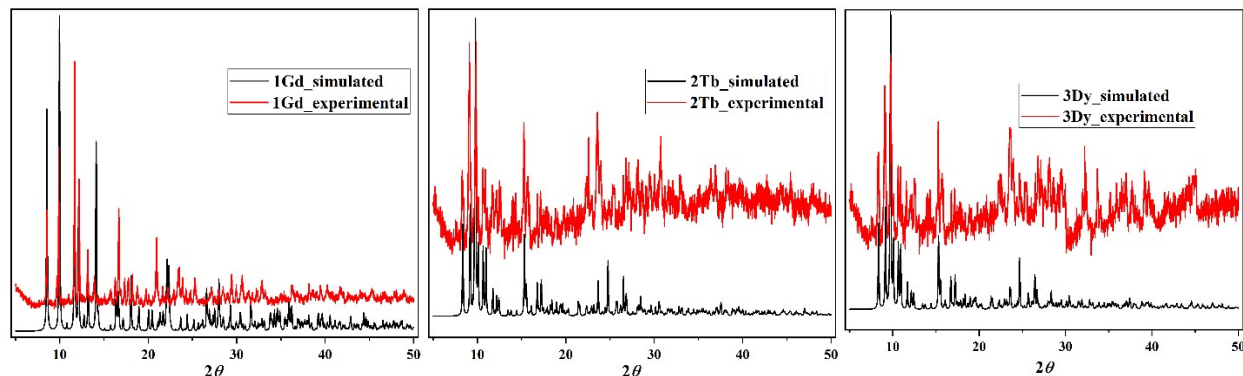

Fig. S1 Powder X-ray diffraction of Complexes **1** (left), **2** (middle) and **3** (right).

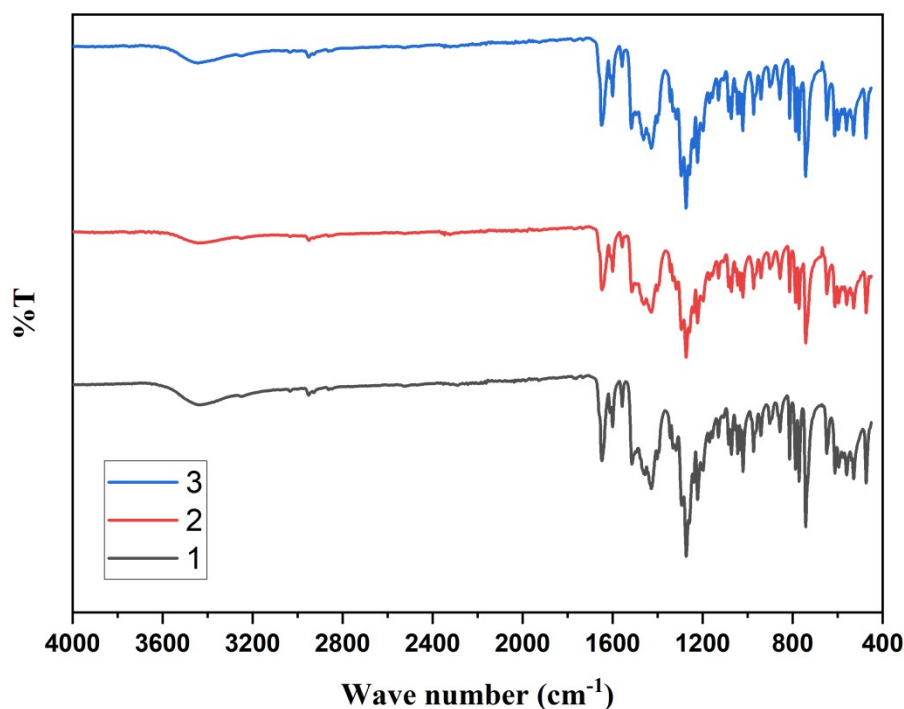

Fig. S2 IR spectra of complexes **1** — **3**.

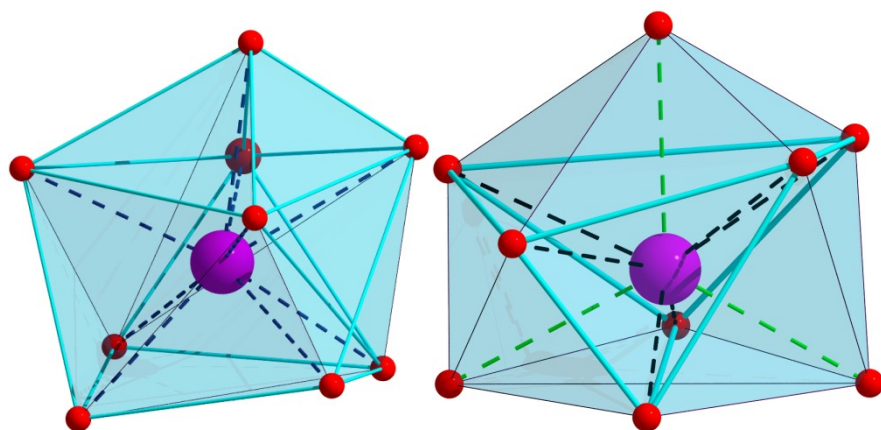

**Fig. S3** Polyhedral view of Gd (1, left) and Ln (Tb(2) and Dy(3), right). (Colour code: Oxygen-red and violet- lanthanoid)

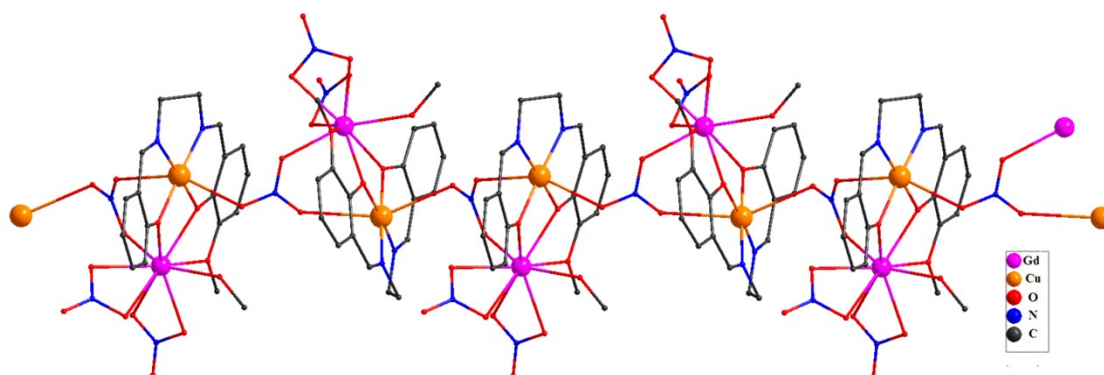

**Fig. S4** Polymeric chain of complex 1.

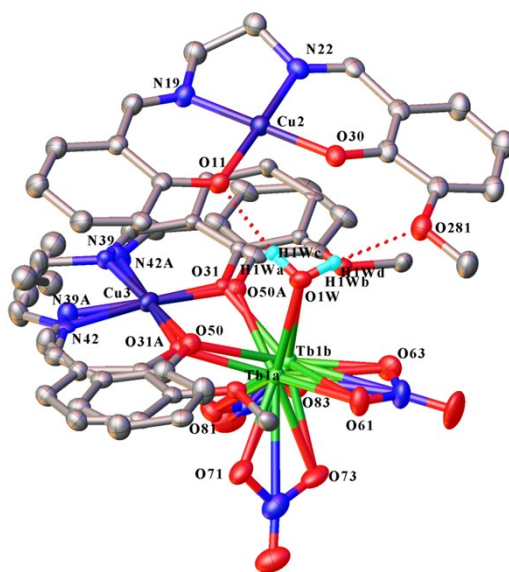

**Fig. S5.** ORTEP view of complex 2 with 20% ellipsoid probability. H-atoms except coordinated water molecules are omitted for clarity. H-bond presented by red dotted line.

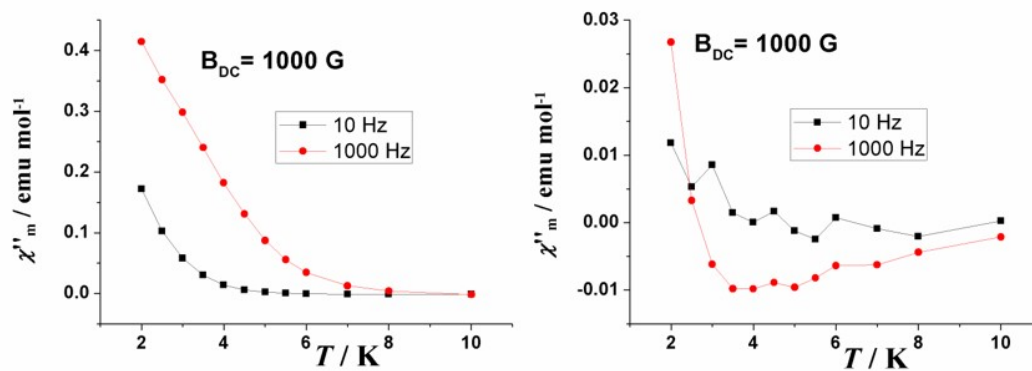

**Fig. S6.** DC field measurements for 1 (left) and 3 (right) indicating a non-clear response in their imaginary component of the susceptibility.

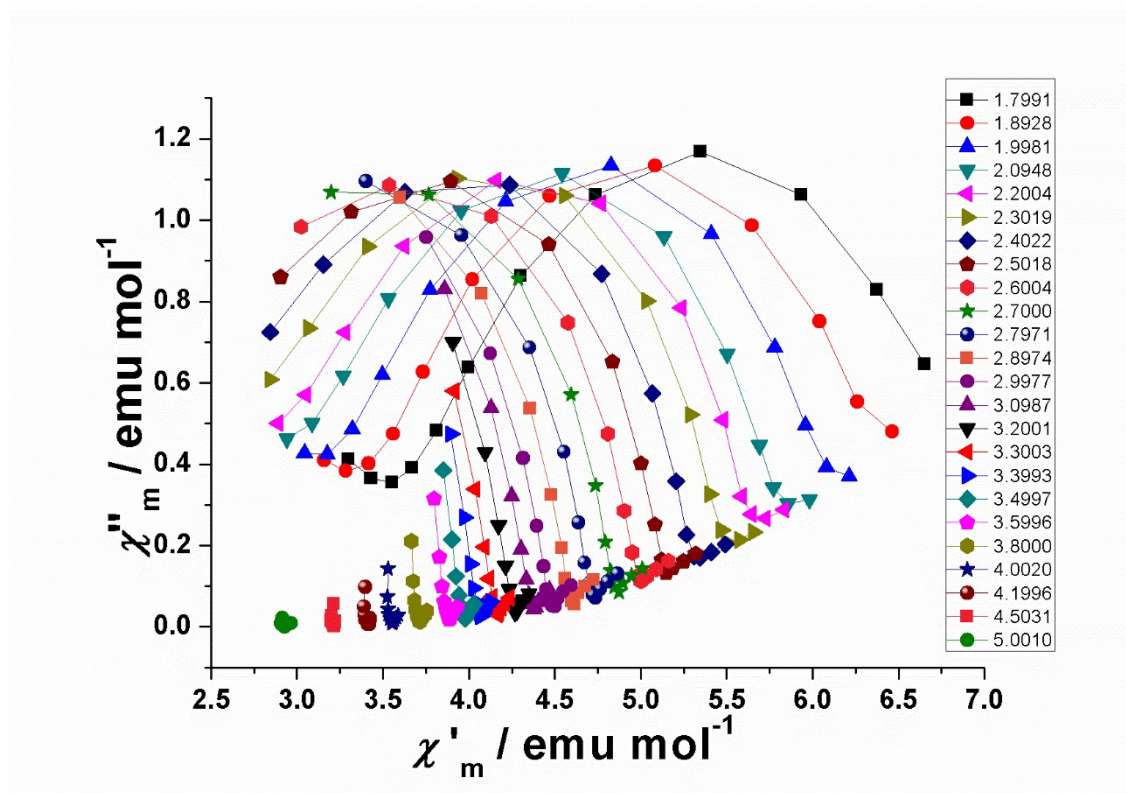

**Fig. S7.**  $\chi'$  vs  $\chi''$  representation for complex 2. Experimental data is represented with dots and the fitting with solid line.

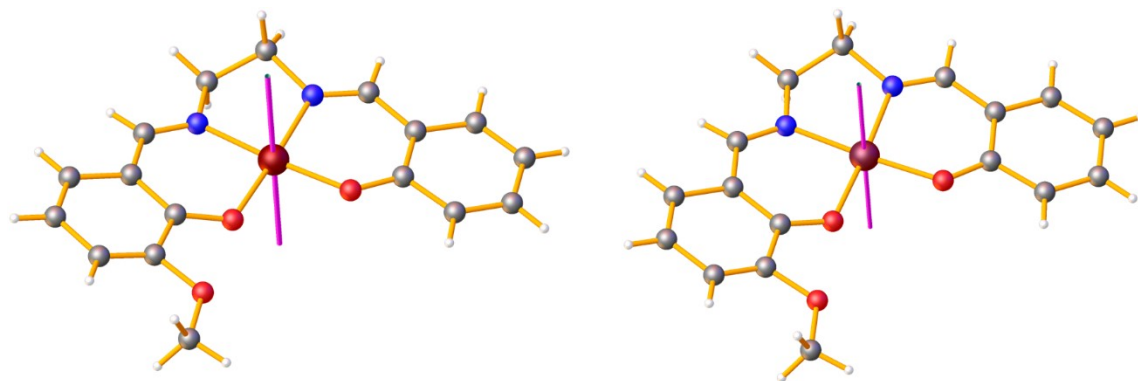

**Fig. S8.** The solid line corresponds to the orientation of main anisotropy axis in the ground state for Cu<sub>2</sub> center in complex **2** (left) and **3** (right).

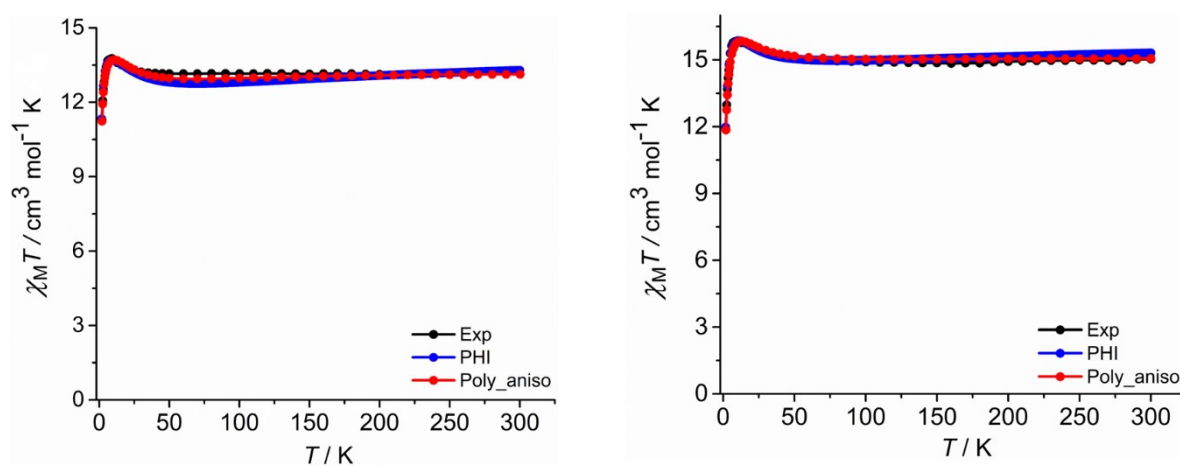

**Fig. S9.** Variable temperature magnetic susceptibility with the simulated susceptibility obtained from poly\_aniso and PHI for complex **2** (left) and **3** (right).

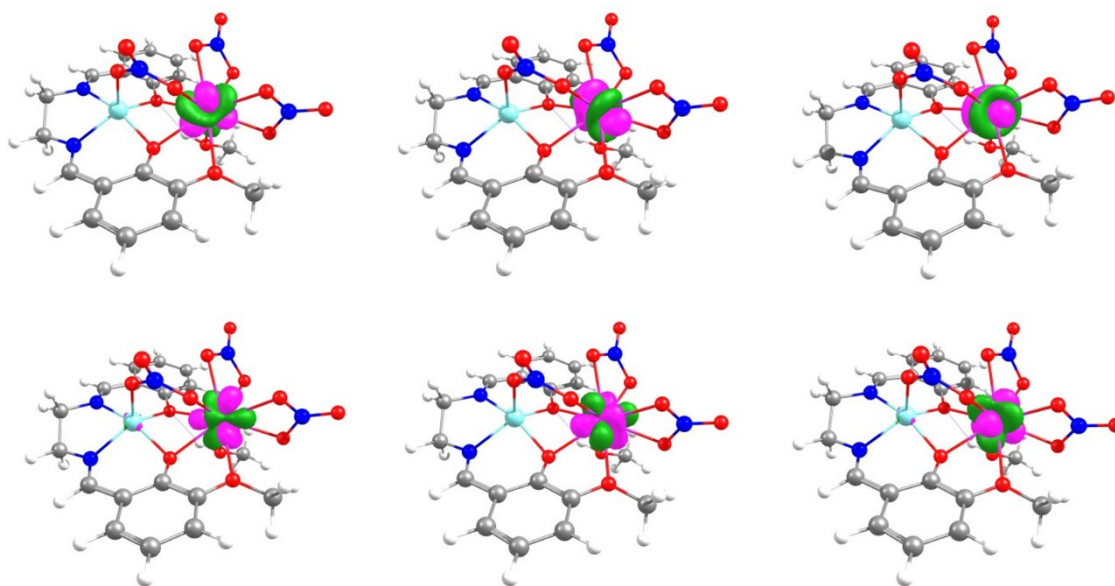

**Fig. S10.** Interacting 4f magnetic orbitals of Gd(III) center for complex **1**.

**Table S1** SHAPE analysis for the lanthanoid centers in all complex (the lowest values are indicated in bold).

| Geometry                                  | Symmetry | <b>1</b>     | <b>2</b>     | <b>3</b>     |
|-------------------------------------------|----------|--------------|--------------|--------------|
| Enneagon                                  | D9h      | 34.280       | 33.956       | 30.559       |
| Octagonal pyramid                         | C8v      | 21.594       | 18.597       | 17.487       |
| Heptagonal bipyramid                      | D7h      | 14.346       | 18.461       | 18.590       |
| Johnson triangular cupola J3              | C3v      | 13.329       | 16.667       | 17.072       |
| Capped cube J8                            | C4v      | 8.272        | 11.271       | 12.358       |
| Spherical-relaxed capped cube             | C4v      | 6.604        | 10.120       | 11.141       |
| Capped square antiprism J10               | C4v      | 3.408        | 3.896        | 5.317        |
| <b>Spherical capped square antiprism</b>  | C4v      | <b>2.278</b> | 3.266        | 4.569        |
| Tricapped trigonal prism J51              | D3h      | 4.233        | 5.405        | 7.142        |
| <b>Spherical tricapped trigonal prism</b> | D3h      | 2.845        | <b>2.698</b> | <b>4.506</b> |
| Tridiminished icosahedron J63             | C3v      | 10.637       | 9.698        | 9.935        |
| Hula-hoop                                 | C2v      | 10.710       | 12.337       | 12.273       |
| Muffin                                    | Cs       | 2.922        | 4.294        | 5.012        |

**Table S2** Bond lengths (Å) of complexes **1 – 3**.

| Complex     | <b>1</b> | Complex     | <b>2 (M=Tb1b)</b> | <b>3 (M=Dy)</b> |
|-------------|----------|-------------|-------------------|-----------------|
| Gd(1)-O(50) | 2.332(3) | Dy(1)-O(50) |                   | 2.21(4)         |
|             |          | M(1)-O(50A) | 2.51(2)           | 2.39(2)         |
| Gd(1)-O(1)  | 2.421(3) | M(1)-O(1W)  | 2.463(12)         | 2.401(9)        |
| Gd(1)-O(61) | 2.474(3) | M(1)-O(61)  | 2.402(14)         | 2.419(11)       |
| Gd(1)-O(63) | 2.456(3) | M(1)-O(81)  | 2.478(13)         | 2.466(10)       |
| Gd(1)-O(31) | 2.424(3) | M(1)-O(63)  | 2.558(15)         | 2.448(12)       |
| Gd(1)-O(71) | 2.489(3) | Dy(1)-O(31) |                   | 2.53(4)         |
|             |          | M(1)-O(31A) | 2.26(2)           | 2.327(19)       |
| Gd(1)-O(73) | 2.515(3) | M(1)-O(71)  | 2.320(17)         | 2.465(13)       |
| Gd(1)-O(83) | 2.401(3) | M(1)-O(73)  | 2.488(14)         | 2.509(11)       |

|              |          |              |           |           |
|--------------|----------|--------------|-----------|-----------|
| Gd(1)-O(481) | 2.625(3) | M(1)-O(83)   | 2.638(17) | 2.542(12) |
| Cu(3)-N(42)  | 1.922(3) | Cu(2)-O(30)  | 1.900(13) | 1.908(9)  |
| Cu(3)-O(50)  | 1.921(3) | Cu(2)-O(11)  | 1.906(12) | 1.909(9)  |
| Cu(3)-N(39)  | 1.919(3) | Cu(2)-N(22)  | 1.938(15) | 1.937(11) |
| Cu(3)-O(31)  | 1.931(3) | Cu(2)-N(19)  | 1.935(16) | 1.936(12) |
| Cu(3)-O(81)  | 2.787(4) | Cu(3)-N(42)  | 2.05(5)   | 2.05(4)   |
|              |          | Cu(3)-N(42A) | 1.98(3)   | 2.01(2)   |
| Cu(3)-O(84*) | 2.729(3) | Cu(3)-O(50)  | 2.01(5)   | 2.01(4)   |
|              |          | Cu(3)-O(50A) | 2.00(2)   | 1.99(2)   |
| Gd(1)-N(62)  | 2.892(4) | Cu(3)-N(39)  | 1.73(5)   | 1.73(4)   |
|              |          | Cu(3)-N(39A) | 1.82(3)   | 1.824(18) |
| Gd(1)-N(72)  | 2.935(4) | Cu(3)-O(31)  | 1.75(4)   | 1.76(4)   |
|              |          | Cu(3)-O(31A) | 1.84(2)   | 1.849(18) |

\* = 1-x, -1/2+y, 1/2-z

**Table S3** Bond angles (°) of complex **1**.

| complex <b>1</b>     |            |                      |            |
|----------------------|------------|----------------------|------------|
| O(1) -Gd(1)-O(31)    | 72.31(10)  | O(63) - Gd(1)-O(71)  | 110.40(10) |
| O(1) - Gd(1)-O(50)   | 75.53(10)  | O(63) - Gd(1)-O(73)  | 67.94(11)  |
| O(1) - Gd(1)-O(61)   | 123.73(10) | O(63) - Gd(1)-O(83)  | 117.62(11) |
| O(1) - Gd(1)-O(63)   | 72.11(10)  | O(63) - Gd(1)-O(481) | 73.35(10)  |
| O(1) - Gd(1)-O(71)   | 128.97(11) | O(71) - Gd(1)-O(73)  | 50.81(11)  |
| O(1) - Gd(1)-O(73)   | 89.75(12)  | O(71) - Gd(1)-O(83)  | 73.39(11)  |
| O(1) - Gd(1)-O(83)   | 153.17(10) | O(71) - Gd(1)-O(481) | 144.33(9)  |
| O(1) - Gd(1)-O(481)  | 86.49(10)  | O(73) - Gd(1)-O(83)  | 117.04(12) |
| O(31) - Gd(1)-O(50)  | 66.80(9)   | O(73) - Gd(1)-O(481) | 140.32(10) |
| O(31) - Gd(1)-O(61)  | 152.65(10) | O(81) - Gd(1)-O(481) | 73.91(10)  |
| O(31) - Gd(1)-O(63)  | 136.33(10) | O(31) -Cu(3)-N(39)   | 95.11(12)  |
| O(31) - Gd(1)-O(71)  | 74.72(10)  | O(31) -Cu(3)-N(42)   | 177.33(15) |
| O(31) - Gd(1)-O(73)  | 87.45(11)  | O(31) -Cu(3)-O(50)   | 85.67(12)  |
| O(31) - Gd(1)-O(83)  | 105.54(11) | O(31) -Cu(3)-O(81)   | 85.20(13)  |
| O(31) - Gd(1)-O(481) | 128.26(9)  | O(31) -Cu(3)-O(84*)  | 77.04(10)  |
| O(50) - Gd(1)-O(61)  | 135.04(10) | O(50) -Cu(3)-N(39)   | 174.77(15) |

|                      |            |                        |            |
|----------------------|------------|------------------------|------------|
| O(50) - Gd(1)-O(63)  | 125.82(10) | O(50) -Cu(3)-N(42)     | 94.55(14)  |
| O(50) - Gd(1)-O(71)  | 123.75(10) | O(50) -Cu(3)-O(81)     | 83.55(11)  |
| O(50) - Gd(1)-O(73)  | 153.09(10) | O(50) -Cu(3)-O(84*)    | 75.28(12)  |
| O(50) - Gd(1)-O(83)  | 79.15(10)  | O(81) -Cu(3)-N(39)     | 99.61(15)  |
| O(50) - Gd(1)-O(481) | 62.31(9)   | O(81) -Cu(3)-N(42)     | 97.43(16)  |
| O(61) - Gd(1)-O(63)  | 51.63(9)   | O(81) -Cu(3)-O(84*)    | 153.29(12) |
| O(61) - Gd(1)-O(71)  | 78.31(11)  | O(84*) -Cu(3)-N(39)    | 101.68(14) |
| O(61) - Gd(1)-O(73)  | 71.86(11)  | O(84*) -Cu(3)-N(42)    | 100.34(14) |
| O(61) - Gd(1)-O(83)  | 70.38(10)  | N(39) -Cu(3)-N(42)     | 84.92(14)  |
| O(61) - Gd(1)-O(481) | 77.67(10)  | * = 1-x, -1/2+y, 1/2-z |            |

**Table S4** Bond angles (°) of complexes **2 – 3**.

| Complex             | <b>2</b>       | <b>3</b>       |                    | <b>2</b>        | <b>3</b>       |
|---------------------|----------------|----------------|--------------------|-----------------|----------------|
|                     | <b>(M= Tb)</b> | <b>(M =Dy)</b> |                    | <b>(M = Tb)</b> | <b>(M= Dy)</b> |
| O(1w) -M(1)-O(31)   | 82.9(7)        | 82.2(5)        | O(61) -M(1)-O(81)  | 145.0(5)        | 143.3(4)       |
| O(1w) -M(1)-O(50)   | 70.7(8)        | 73.0(7)        | O(61) -M(1)-O(83)  | 115.1(5)        | 118.4(4)       |
| O(1w) -M(1)-O(61)   | 75.7(5)        | 75.4(4)        | O(63) -M(1)-O(71)  | 115.4(5)        | 114.7(4)       |
| O(1w) -M(1)-O(63)   | 78.3(5)        | 80.5(4)        | O(63) -M(1)-O(73)  | 70.5(6)         | 72.1(4)        |
| O(1w) -M(1)-O(71)   | 137.0(5)       | 130.7(3)       | O(63) -M(1)-O(81)  | 116.2(5)        | 121.5(4)       |
| O(1w) -M(1)-O(73)   | 145.1(5)       | 145.5(4)       | O(63) -M(1)-O(83)  | 69.9(5)         | 73.5(4)        |
| O(1w) -M(1)-O(81)   | 137.8(4)       | 141.3(3)       | O(71) -M(1)-O(73)  | 52.2(6)         | 50.7(4)        |
| O(1w) -M(1)-O(83)   | 118.2(5)       | 124.7(4)       | O(71) -M(1)-O(81)  | 75.2(5)         | 72.5(4)        |
| O(31A) -M(1)-O(50A) | 67.5(7)        | 65.5(3)        | O(71) -M(1)-O(83)  | 104.6(5)        | 104.6(4)       |
| O(31A) -M(1)-O(61)  | 130.0(6)       | 123.5(5)       | O(73) -M(1)-O(81)  | 72.4(5)         | 72.7(4)        |
| O(31A) -M(1)-O(63)  | 160.2(7)       | 162.7(6)       | O(73) -M(1)-O(83)  | 65.0(6)         | 67.0(4)        |
| O(31A) -M(1)-O(71)  | 82.8(7)        | 77.2(5)        | O(81) -M(1)-O(83)  | 47.6(5)         | 50.1(4)        |
| O(31A) -M(1)-O(73)  | 129.2(8)       | 124.0(6)       | O(11) -Cu(2)-N(19) | 92.3(6)         | 93.2(5)        |
| O(31A) -M(1)-O(81)  | 74.6(7)        | 73.1(5)        | O(11) -Cu(2)-N(22) | 176.3(6)        | 176.6(4)       |
| O(31A) -M(1)-O(83)  | 114.9(6)       | 117.0(5)       | O(11) -Cu(2)-O(30) | 89.6(5)         | 89.7(4)        |
| O(50A) -M(1)-O(61)  | 139.9(8)       | 144.5(7)       | O(30) -Cu(2)-N(19) | 176.8(6)        | 176.4(4)       |
| O(50A) -M(1)-O(63)  | 101.0(7)       | 106.9(6)       | O(30) -Cu(2)-N(22) | 93.1(6)         | 92.3(5)        |
| O(50A) -M(1)-O(71)  | 136.7(7)       | 134.3(6)       | N(19) -Cu(2)-N(22) | 85.0(7)         | 84.7(5)        |

|                    |          |          |                                            |                        |                        |
|--------------------|----------|----------|--------------------------------------------|------------------------|------------------------|
| O(50A) -M(1)-O(73) | 129.7(8) | 134.6(7) | O(31) -Cu(3)-N(39)<br>O(31A) -Cu(3)-N(39A) | 103.0(16)<br>99.0(10)  | 103.6(16)<br>99.3(8)   |
| O(50A) -M(1)-O(81) | 67.7(8)  | 70.2(7)  | O(31) -Cu(3)-N(42)<br>O(31A) -Cu(3)-N(42A) | 174.5(15)<br>175.0(13) | 172.8(15)<br>176.1(11) |
| O(50A) -M(1)-O(83) | 65.6(7)  | 69.4(7)  | O(31) -Cu(3)-O(50)<br>O(31A) -Cu(3)-O(50A) | 83.5(16)<br>86.2(9)    | 83.2(15)<br>86.0(8)    |
| O(61) -M(1)-O(63)  | 50.3(5)  | 51.5(4)  | O(50) -Cu(3)-N(39)<br>O(50A) -Cu(3)-N(39A) | 170.0(2)<br>173.4(12)  | 172.2(15)<br>173.4(9)  |
| O(61) -M(1)-O(71)  | 83.3(5)  | 79.6(4)  | O(50) -Cu(3)-N(42)<br>O(50A) -Cu(3)-N(42A) | 91.2(16)<br>92.1(10)   | 89.9(13)<br>91.6(9)    |
| O(61) -M(1)-O(73)  | 72.6(2)  | 71.3(4)  | N(39) -Cu(3)-N(42)<br>N(39A) -Cu(3)-N(42A) | 82.5(16)<br>82.4(11)   | 83.5(13)<br>82.8(9)    |

**Table S5.** Geometrical features of hydrogen bonding interactions (distances (Å) and angles (°)) of Complexes **2** and **3**.

| Complex  | D-H...A                 | D-H (Å)   | H...A (Å) | D...A (Å) | ∠D-H...A (°) |
|----------|-------------------------|-----------|-----------|-----------|--------------|
| <b>1</b> | O(1) -H(1) ...O(84*)    | 0.85(3)   | 1.95(3)   | 2.796(4)  | 174.7(7)     |
| <b>2</b> | O(1W) -H(1WC) ...O(11)  | 0.861(18) | 1.945(18) | 2.791(18) | 167.3(13)    |
|          | O(1W) -H(1WD) ...O(281) | 0.860(16) | 2.163(18) | 2.894(18) | 142.7(13)    |
| <b>3</b> | O(1W) -H(1WB) ...O(11)  | 0.86(3)   | 1.96(3)   | 2.793(12) | 165(4)       |
|          | O(1W) -H(1WA) ...O(281) | 0.87(6)   | 2.18(5)   | 2.908(14) | 142(7)       |

\* = 1-x, -1/2+y, 1/2-z

**Table S6:** Main values of the g tensor for the lowest Kramers doublet on **Cu1** site in complex **2** and **3**.

| Complex  | Energy (cm <sup>-1</sup> ) | g <sub>x</sub> | g <sub>y</sub> | g <sub>z</sub> | Average g |
|----------|----------------------------|----------------|----------------|----------------|-----------|
| <b>2</b> | 0.000                      | 2.068          | 2.078          | 2.358          | 2.168     |
| <b>3</b> | 0.000                      | 2.071          | 2.079          | 2.371          | 2.173     |

**Table S7:** Main values of the g tensor for the lowest Kramers doublet on **Cu2** site in complex **2** and **3**.

| Complex | Energy (cm <sup>-1</sup> ) | g <sub>x</sub> | g <sub>y</sub> | g <sub>z</sub> | Average g |
|---------|----------------------------|----------------|----------------|----------------|-----------|
|---------|----------------------------|----------------|----------------|----------------|-----------|



|          |       |       |       |       |       |
|----------|-------|-------|-------|-------|-------|
| <b>2</b> | 0.000 | 2.075 | 2.079 | 2.429 | 2.194 |
| <b>3</b> | 0.000 | 2.071 | 2.079 | 2.434 | 2.194 |

**Table S8.** Ab initio calculated low-lying spin-free energy states for the complexes **2** and **3**.

| <b>Complex 2</b> |            |            | <b>Complex 3</b> |            |            |
|------------------|------------|------------|------------------|------------|------------|
| <b>Tb1</b>       | <b>Cu1</b> | <b>Cu2</b> | <b>Dy1</b>       | <b>Cu1</b> | <b>Cu2</b> |
| 0.000            | 0.000      | 0.000      | 0.000            | 0.000      | 0.000      |
| 254.1866         | 15104.0    | 12832.9    | 5.1881           | 14616.6    | 12681.9    |
| 334.7954         | 16435.3    | 15168.2    | 146.0808         | 15916.8    | 15071.1    |
| 589.7838         | 17186.4    | 15920.1    | 189.2308         | 16759.6    | 15760.1    |
| 681.7127         | 17396.5    | 16359.1    | 311.2849         | 16888.2    | 16206.1    |
| 841.1414         |            |            | 389.2209         |            |            |
| 1047.7667        |            |            | 404.9580         |            |            |
| 25752.8283       |            |            | 457.5970         |            |            |
| 25772.8797       |            |            | 522.1624         |            |            |
| 25860.9570       |            |            | 767.0082         |            |            |

**Table S9.** Ab initio calculated low-lying spin-orbit energy states for the investigated complexes.

| <b>Complex 2</b> |            |            | <b>Complex 3</b> |            |            |
|------------------|------------|------------|------------------|------------|------------|
| <b>Tb1</b>       | <b>Cu1</b> | <b>Cu2</b> | <b>Dy1</b>       | <b>Cu1</b> | <b>Cu2</b> |
| 0.0000           | 0.0000     | 0.0000     | 0.000            | 0.000      | 0.000      |
| 0.1382           | 0.0000     | 0.0000     | 0.000            | 0.000      | 0.000      |
| 166.8520         | 14967.2421 | 12795.27   | 121.8143         | 14481.71   | 12648.00   |
| 172.6762         | 14967.2421 | 12795.27   | 121.8143         | 14481.71   | 12648.00   |
| 248.0922         | 16220.40   | 15041.99   | 253.3184         | 15718.18   | 14928.88   |
| 273.0234         | 16220.40   | 15041.99   | 253.3184         | 15718.18   | 14928.88   |
| 339.0670         | 16871.93   | 15548.70   | 309.6681         | 16405.01   | 15398.94   |
| 384.8721         | 16871.93   | 15548.70   | 309.6681         | 16405.01   | 15398.94   |
| 411.9902         | 18363.77   | 17244.88   | 331.8373         | 17887.30   | 17097.81   |
| 523.7558         | 18363.77   | 17244.88   | 331.8373         | 17887.30   | 17097.81   |
|                  |            |            | 388.2979         |            |            |
|                  |            |            | 388.2979         |            |            |
|                  |            |            | 488.8733         |            |            |
|                  |            |            | 488.8733         |            |            |
|                  |            |            | 668.6695         |            |            |
|                  |            |            | 668.6695         |            |            |

**Table S10.** CASSCF/QDPT/Single\_aniso computed energy of the KDs, g, and wave functions composition for first four low-lying states in complex **2** (Tb1).

| State | Energy (cm <sup>-1</sup> ) | Tunnel Splitting | g <sub>z</sub> | Wave function composition                     |
|-------|----------------------------|------------------|----------------|-----------------------------------------------|
| 1     | 0.000                      | 0.138            | 17.86          | 99.53% ±6>+0.27% ±4                           |
| 2     | 0.138                      |                  |                | 99.59% ±6>+0.26% ±4                           |
| 3     | 166.852                    | 5.824            | 14.33          | 80.59% ±5+3.93% ±4+7.56% ±3+5.18% ±2+0.94% ±1 |
| 4     | 172.676                    |                  |                | 85.48% ±5+4.49% ±4+5.79% ±3+3.22% ±2+0.95% ±1 |

**Table S11.** CASSCF/QDPT/Single\_aniso computed energy of the KDs, g, and wave functions composition in complex **3** (Dy1).

| Kramers doublets (KDs) | Energy (cm <sup>-1</sup> ) | g <sub>x</sub> | g <sub>y</sub> | g <sub>z</sub> | Wave function composition                                                                              |
|------------------------|----------------------------|----------------|----------------|----------------|--------------------------------------------------------------------------------------------------------|
| 1                      | 0.000                      | 0.07           | 0.010          | 19.59          | 95.82% ±15/2>+0.04% ±13/2>+3.26% ±11/2>                                                                |
| 2                      | 121.814                    | 0.021          | 0.024          | 17.02          | 0.40% ±15/2>+90.66% ±13/2>+5.53% ±11/2>+1.65% ±9/2>+0.95% ±5/2>                                        |
| 3                      | 253.318                    | 1.280          | 1.783          | 12.98          | 2.82% ±15/2>+3.58% ±13/2>+65.69% ±11/2>+12.81% ±9/2>+9.21% ±7/2>+1.30% ±5/2>+1.39% ±3/2>+3.14% ±1/2>   |
| 4                      | 309.668                    | 1.444          | 2.442          | 13.82          | 0.12% ±15/2>+1.10% ±13/2>+6.43% ±11/2>+23.90% ±9/2>+14.26% ±7/2>+36.01% ±5/2>+13.47% ±3/2>+4.66% ±1/2> |
| 5                      | 331.837                    | 2.436          | 4.408          | 12.89          | 0.27% ±15/2>+0.96% ±13/2>+1.37% ±11/2>+10.22% ±9/2>+10.01% ±7/2>+7.64% ±                               |

|   |         |       |       |       |                                                                                                                                                                                                                                 |
|---|---------|-------|-------|-------|---------------------------------------------------------------------------------------------------------------------------------------------------------------------------------------------------------------------------------|
|   |         |       |       |       | $5/2 \rangle + 33.93\%   \pm 3/2 \rangle + 35.56\%   \pm 1/2 \rangle$                                                                                                                                                           |
| 6 | 388.298 | 0.879 | 1.872 | 15.88 | $0.31\%   \pm 15/2 \rangle + 3.01\%   \pm 13/2 \rangle + 14.98\%   \pm 11/2 \rangle + 36.36\%   \pm 9/2 \rangle + 27.77\%   \pm 7/2 \rangle + 9.56\%   \pm 5/2 \rangle + 6.73\%   \pm 3/2 \rangle + 1.25\%   \pm 1/2 \rangle$   |
| 7 | 488.873 | 0.089 | 0.118 | 16.35 | $0.13\%   \pm 15/2 \rangle + 0.15\%   \pm 13/2 \rangle + 1.94\%   \pm 11/2 \rangle + 12.49\%   \pm 9/2 \rangle + 25.08\%   \pm 7/2 \rangle + 13.35\%   \pm 5/2 \rangle + 11.54\%   \pm 3/2 \rangle + 35.28\%   \pm 1/2 \rangle$ |
| 8 | 668.669 | 0.007 | 0.014 | 18.94 | $0.08\%   \pm 15/2 \rangle + 0.46\%   \pm 13/2 \rangle + 0.75\%   \pm 11/2 \rangle + 2.31\%   \pm 9/2 \rangle + 13.08\%   \pm 7/2 \rangle + 31.07\%   \pm 5/2 \rangle + 32.34\%   \pm 3/2 \rangle + 19.87\%   \pm 1/2 \rangle$  |

**Table S12.** SINGLE\_ANISO computed crystal-field parameters for the lanthanide center in complexes **1** and **2**.

|   |    | <b>Complex 2</b> | <b>Complex 3</b> |
|---|----|------------------|------------------|
| K | q  | <b>Tb1</b>       | <b>Dy1</b>       |
|   | -2 | -0.5261E+01      | 0.1574E+01       |
|   | -1 | -0.6857E+00      | 0.5950E+00       |
| 2 | 0  | -0.4754E+01      | -0.2714E+01      |
|   | 1  | -0.1734E+01      | 0.1012E+01       |
|   | 2  | -0.6196E-02      | 0.1588E+01       |
|   |    |                  |                  |
|   | -4 | -0.6018E-03      | 0.2508E-03       |
|   | -3 | 0.2929E-01       | -0.4772E-02      |
|   | -2 | 0.1686E-01       | -0.4153E-02      |
|   | -1 | 0.4202E-02       | -0.1043E-01      |
| 4 | 0  | -0.5043E-02      | -0.2099E-02      |
|   | 1  | 0.2964E-01       | -0.2939E-01      |
|   | 2  | 0.6283E-02       | -0.8008E-03      |
|   | 3  | 0.1402E-00       | -0.2539E-01      |
|   | 4  | -0.3491E-03      | -0.5173E-02      |
|   |    |                  |                  |

|   |    |             |             |
|---|----|-------------|-------------|
|   | -6 | -0.4128E-03 | -0.1019E-03 |
|   | -5 | -0.6881E-03 | -0.1055E-02 |
|   | -4 | -0.1172E-03 | -0.9520E-04 |
|   | -3 | -0.1959E-03 | -0.1700E-03 |
|   | -2 | 0.2133E-03  | -0.1581E-03 |
|   | -1 | 0.2354E-03  | 0.1474E-03  |
| 6 | 0  | 0.3132E-04  | 0.1186E-04  |
|   | 1  | -0.3867E-03 | 0.4096E-03  |
|   | 2  | -0.2158E-03 | 0.1536E-03  |
|   | 3  | -0.6206E-03 | -0.3542E-04 |
|   | 4  | -0.2341E-03 | -0.1681E-03 |
|   | 5  | 0.1029E-02  | -0.1925E-03 |
|   | 6  | 0.4778E-03  | 0.1193E-03  |

The following Hamiltonian is used to calculate the crystal field parameters.

$$\hat{H}_{CF} = \sum_{k=-q}^q B_q^k \hat{\sigma}_q^k$$

Where  $\hat{\sigma}_q^k$  = extended Stevens operator, k = rank of the ITO (2,4,6), q = the component of the ITO, = -k, -k+1, ... 0, 1, ... k.

### Simulation of molar magnetic susceptibility

To quantify, the exchange interaction, we have performed the simulations of molar magnetic susceptibility data using PHI software<sup>9</sup> and Poly\_aniso module<sup>10</sup> of ORCA 5.0.2 for the studied complexes. In PHI, we have used the following Hamiltonian (Eq-a) where the crystal field parameters obtained from the ab initio calculations were kept fixed during the simulation (here  $J_1$  and  $J_2 = J_{total} = J_{dip} + J_{ex}$ ).

$$\hat{H}_{CF} = -2J_1 (S_{Cu1} \cdot S_{Ln1}) - 2J_2 (S_{Cu2} \cdot S_{Ln1}) + \beta (g_{Cu1} \cdot S_{Cu1} + g_{Cu2} \cdot S_{Cu2} + g_{Ln1} \cdot S_{Ln1}) \cdot B + B_0^2 C_0^2 + B_0^4 C_0^4 + B_0^6 C_0^6 \dots \dots \dots (Eq-a)$$

The best simulation of both susceptibility and magnetization results in ferromagnetic interactions between Cu and lanthanide metal ions (Table S13) with the intermolecular interactions of -0.011 and -0.013 cm<sup>-1</sup> for complexes **2** and **3** respectively.

Further, the simulation was also performed using poly\_aniso with Ising-type Hamiltonian (Eq-b) and intermolecular interactions.

$$\hat{H} = -J_1 (\hat{S}_{Cu1,z} \cdot \hat{S}_{Ln1,z}) - J_2 (\hat{S}_{Cu2,z} \cdot \hat{S}_{Ln1,z}) + zJ \dots \dots \dots (Eq-b)$$

The dipolar part is considered exactly (Table S14) while the exchange part was obtained from the best fitting of the susceptibility data (Table S13). The best simulation of magnetic data results in ferromagnetic interactions between Cu and lanthanide metal ions for the studied complexes.

**Table S13:** Parameters obtained from the simulation of magnetic data using PHI and Poly\_aniso module for complexes **2** and **3**.

| Complex  | PHI                        |                            |                 |                 | CF parameter / $\text{cm}^{-1}$                                                 | Poly_aniso                 |                            |                           |
|----------|----------------------------|----------------------------|-----------------|-----------------|---------------------------------------------------------------------------------|----------------------------|----------------------------|---------------------------|
|          | $J_1$ ( $\text{cm}^{-1}$ ) | $J_2$ ( $\text{cm}^{-1}$ ) | $g_{\text{Cu}}$ | $g_{\text{Ln}}$ |                                                                                 | $J_1$ ( $\text{cm}^{-1}$ ) | $J_2$ ( $\text{cm}^{-1}$ ) | $zJ$ ( $\text{cm}^{-1}$ ) |
| <b>2</b> | +15.5                      | +3.5                       | 2.17            | 1.48 ( $g_J$ )  | $B_{2=}^0 = -4.754$<br>$B_{4=}^0 = 0.00504$<br>$B_{6=}^0 = 3.13 \times 10^{-5}$ | +9.02                      | +1.8                       | -<br>0.040                |
| <b>3</b> | +16.3                      | +5.9                       | 2.16            | 1.30 ( $g_J$ )  | $B_{2=}^0 = -2.714$<br>$B_{4=}^0 = 0.0020$<br>$B_{6=}^0 = 1.18 \times 10^{-5}$  | +12.03                     | +3.8                       | -<br>0.063                |

**Table S14:** Poly\_aniso calculated energy of the lowest spin-orbit states ( $\text{cm}^{-1}$ ) for complexes **2** and **3**.

| Complex 2     |               |         |                | Complex 3     |               |         |                |
|---------------|---------------|---------|----------------|---------------|---------------|---------|----------------|
| Exchange only | Dipole-dipole | Total   | Total relative | Exchange only | Dipole-dipole | Total   | Total relative |
| -15.869       | -0.17780      | -16.011 | 0.00000        | -19.368       | -0.26404      | -19.536 | 0.0000         |
| -15.869       | -0.17288      | -16.011 | 0.00015        | -19.368       | -0.26404      | -19.536 | 0.0000         |
| -10.578       | -0.10099      | -10.709 | 5.30251        | -10.298       | -0.19208      | -10.492 | 9.0435         |
| -10.576       | -0.09893      | -10.707 | 5.30429        | -10.298       | -0.19208      | -10.492 | 9.0435         |
| 10.275        | 0.22907       | 10.400  | 26.4126        | 9.575         | 0.19058       | 9.7663  | 29.302         |
| 10.277        | 0.23026       | 10.402  | 26.4139        | 9.575         | 0.19058       | 9.7663  | 29.302         |
| 15.560        | 0.31900       | 15.716  | 31.7281        | 18.633        | 0.26543       | 18.817  | 38.354         |
| 15.567        | 0.32493       | 15.722  | 31.7344        | 18.633        | 0.26543       | 18.817  | 38.354         |
| 157.312       | 166.835       | 157.150 | 173.162        | 105.841       | 121.600       | 105.743 | 125.280        |
| 157.316       | 166.837       | 157.155 | 173.167        | 105.841       | 121.600       | 105.743 | 125.280        |
| 161.277       | 166.847       | 161.115 | 177.127        | 113.652       | 121.657       | 113.515 | 133.051        |
| 161.330       | 166.867       | 161.163 | 177.175        | 113.652       | 121.657       | 113.515 | 133.051        |

|         |         |         |         |         |         |         |         |
|---------|---------|---------|---------|---------|---------|---------|---------|
| 178.633 | 172.669 | 178.786 | 194.798 | 130.701 | 121.971 | 130.824 | 150.360 |
| 178.682 | 172.670 | 178.830 | 194.842 | 130.701 | 121.971 | 130.824 | 150.360 |
| 182.661 | 172.682 | 182.827 | 198.839 | 138.518 | 122.028 | 138.618 | 158.155 |
| 182.664 | 172.703 | 182.833 | 198.845 | 138.518 | 122.028 | 138.618 | 158.155 |

**Table S15.** Energies (cm<sup>-1</sup>) of the low-lying exchange doublet states for the complexes **2** and **3**.

| Complex 2 |       | Complex 3 |       |
|-----------|-------|-----------|-------|
| Energy    | $g_z$ | Energy    | $g_z$ |
| 0.00000   | 22.29 | 0.00000   | 23.89 |
| 0.00015   |       | 0.00000   |       |
| 5.302     | 17.81 | 9.044     | 19.57 |
| 5.304     |       | 9.044     |       |

### Ab initio calculations details

All calculations were carried out on the coordinates obtained from the relevant crystal structure using the ORCA 5.0.2 software package.<sup>1</sup> The position of hydrogen atoms was optimized at the DFT level using pure GGA PBE exchange correlation functional<sup>2</sup> keeping constant the position of other atoms. To avoid the convergence problem, we have used diamagnetic Y<sup>+3</sup> ion during the optimizations. The def2-TZVP basis sets with effective core potential (ECP) to treat the core electrons of Y have been used throughout DFT the calculations. The DKH Hamiltonian was used throughout to consider relativistic effects. The lanthanide centre was modelled with the SARC2-DKH-QZVP basis set, and all other atoms were treated with the DKH-def2-TZVP basis set in combination with the ‘AutoAux’ auxiliary basis set.<sup>3</sup> The active space was constructed from nine electrons in five d orbitals CAS(9,5) for Cu(II) ions, eight electrons in seven f-orbitals for terbium CAS(8,7) and CAS(9,7) was constructed from nine electrons in seven f-orbitals for dysprosium. In the configuration integration procedure we have computed 5 doublet excited states for each of the Cu(II) ion to extract the spin projection on respective Cu(II) ions in complexes **2** and **3** while 7 septets, 76 quintets, and 52 triplets for terbium and 21 sextets, 128 quartets, and 130 doublets were considered for dysprosium. To include the spin-orbit coupling, we also used the quasi-degenerate perturbation theory (QDPT) approach using SA-CASSCF wave functions.<sup>4</sup> The SINGLE\_ANISO module as implemented in ORCA was used to compute the g-tensor and crystal field parameters of the low-lying excited states using previously calculated spin-orbit states.<sup>5</sup> Further, to estimate the Cu-Ln exchange interactions and analyse possible relaxation dynamics we have used Poly\_aniso module for the simulation of magnetic susceptibility data.

### DFT calculations details

The BS-DFT calculations were performed on the coordinates obtained from the X-ray structure using Gaussian09<sup>5</sup> programme without optimizations. We used hybrid B3LYP functional along

with effective core potential ‘Stuttgart RSC 1997’ basis set<sup>6</sup> for Gd, and Ahlrichs triple- $\zeta$  TZV basis set<sup>7</sup> for the other atoms. The exchange coupling constants have been calculated by Yamaguchi approach as it is approximately valid over the whole coupling strength regime using equation 1, where  $E_T$ ,  $E_{BS}$ , and  $S$  represent the energy of the high spin state, broken-symmetry state and total spin respectively.

$$J = \frac{-(E_T - E_{BSS})}{\langle S^2 \rangle_T - \langle S^2 \rangle_{BSS}} \dots \dots \dots \text{Eq. c}$$

| Energy of the high spin and broken symmetry state for <b>1</b> |                  |                       |                         |
|----------------------------------------------------------------|------------------|-----------------------|-------------------------|
| Spin State                                                     | Energy (Hartree) | $\langle S^2 \rangle$ | $J$ (cm <sup>-1</sup> ) |
| HS                                                             | -4356.11443701   | 20.01                 | +2.93                   |
| BS                                                             | -4356.11434342   | 13.01                 |                         |

## Reference

1. F. Neese, F. Wennmohs, U. Becker and C. Riplinger, *J. chem. phys.*, 2020, **152**, 224108.
2. (a) J. P. Perdew, K. Burke and M. Ernzerhof, *Phys. Rev. Lett.*, 1997, **78**, 1396-1396; (b) J. P. Perdew, K. Burke and M. Ernzerhof, *Phys. Rev. Lett.*, 1996, **77**, 3865-3868.
3. (a) D. Aravena, F. Neese and D. A. Pantazis, *J. Chem. Theory Comput.*, 2016, **12**, 1148-1156; (b) J. Chmela and M. E. Harding, *Mol. Phys.*, 2018, **116**, 1523-1538; (c) F. Weigend and R. Ahlrichs, *Phys. Chem. Chem. Phys.*, 2005, **7**, 3297-3305.
4. D. Ganyushin and F. Neese, *J. Chem. Phys.*, 2006, **125**, 24103.
5. L. F. Chibotaru and L. Ungur, *J. Chem. Phys.*, 2012, **137**, 64112.
6. M. J. Frisch, G. W. Trucks, H. B. Schlegel, G. E. Scuseria, M. A. Robb, J. R. Cheeseman, G. Scalmani, V. Barone, G. A. Petersson, H. Nakatsuji, X. Li, M. Caricato, A. V. Marenich, J. Bloino, B. G. Janesko, R. Gomperts, B. Mennucci, H. P. Hratchian, J. V. Ortiz, A. F. Izmaylov, J. L. Sonnenberg, Williams, F. Ding, F. Lipparini, F. Egidi, J. Goings, B. Peng, A. Petrone, T. Henderson, D. Ranasinghe, V. G. Zakrzewski, J. Gao, N. Rega, G. Zheng, W. Liang, M. Hada, M. Ehara, K. Toyota, R. Fukuda, J. Hasegawa, M. Ishida, T. Nakajima, Y. Honda, O. Kitao, H. Nakai, T. Vreven, K. Throssell, J. A. Montgomery Jr., J. E. Peralta, F. Ogliaro, M. J. Bearpark, J. J. Heyd, E. N. Brothers, K. N. Kudin, V. N. Staroverov, T. A. Keith, R. Kobayashi, J. Normand, K. Raghavachari, A. P. Rendell, J. C. Burant, S. S. Iyengar, J. Tomasi, M. Cossi, J. M. Millam, M. Klene, C. Adamo, R. Cammi, J. W. Ochterski, R. L. Martin, K. Morokuma, O. Farkas, J. B. Foresman and D. J. Fox, *Journal*, 2016.
7. M. Dolg, H. Stoll and H. Preuss, *J. Chem. Phys.*, 1989, **90**, 1730-1734.
8. A. Schäfer, C. Huber and R. Ahlrichs, *J. Chem. Phys.*, 1994, **100**, 5829-5835.
